# Supplementary material
Source: PubMed Central journal article supplement (PMC7294724)
Supplement: ml0c00102_si_002.pdf [file ml0c00102_si_002.pdf]

|                                                                                                         |                                                                                                         |                                                                                                                    |                                                                                                           |
|---------------------------------------------------------------------------------------------------------|---------------------------------------------------------------------------------------------------------|--------------------------------------------------------------------------------------------------------------------|-----------------------------------------------------------------------------------------------------------|
| <p>ZINC02390914_1</p> 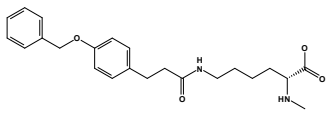 | <p>ZINC74301335</p>    | <p>ZINC19363073_1</p>            | <p>ZINC91691813</p>    |
| <p>ZINC00086677</p>    | <p>ZINC19415361</p>    | <p>ZINC27517858</p>              | <p>ZINC02567979</p>    |
| <p>ZINC06188443</p>  | <p>ZINC38518588</p>  | <p>ZINC20362930</p>            | <p>ZINC02567989</p>  |
| <p>ZINC04344259</p>  | <p>ZINC01718790</p>  | <p>ZINC19481317</p>  <p>4e</p> | <p>ZINC41056956</p>  |
| <p>ZINC34925169</p>  | <p>ZINC43769333</p>  | <p>ZINC15014430</p>            | <p>ZINC22873314</p>  |

|                                                                                                                |                                                                                                                |                                                                                                                   |                                                                                                                  |
|----------------------------------------------------------------------------------------------------------------|----------------------------------------------------------------------------------------------------------------|-------------------------------------------------------------------------------------------------------------------|------------------------------------------------------------------------------------------------------------------|
| <p><b>ZINC04218838</b></p> 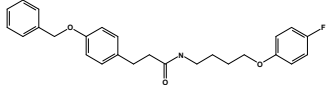   | <p><b>ZINC40434960</b></p>    | <p><b>ZINC04203927</b></p>      | <p><b>ZINC20429491</b></p>    |
| <p><b>ZINC02165124</b></p>    | <p><b>ZINC32014910</b></p>    | <p><b>ZINC79420172</b></p>      | <p><b>ZINC00810513</b></p>    |
| <p><b>ZINC11730119</b></p>   | <p><b>ZINC11888304</b></p>   | <p><b>ZINC02468873_1</b></p>   | <p><b>ZINC04218301</b></p>   |
| <p><b>ZINC54956872</b></p>  | <p><b>ZINC03158792</b></p>  | <p><b>ZINC19473369</b></p>    | <p><b>ZINC49585019</b></p>  |
| <p><b>ZINC06718984</b></p>  | <p><b>ZINC76667940</b></p>  | <p><b>ZINC32919586_1</b></p>  | <p><b>ZINC32445480</b></p>  |

|                                                                                                                |                                                                                                                |                                                                                                                 |                                                                                                                                   |
|----------------------------------------------------------------------------------------------------------------|----------------------------------------------------------------------------------------------------------------|-----------------------------------------------------------------------------------------------------------------|-----------------------------------------------------------------------------------------------------------------------------------|
| <p><b>ZINC44281070</b></p> 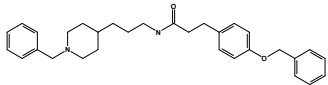   | <p><b>ZINC21953314</b></p>    | <p><b>ZINC42784291</b></p>    | <p><b>ZINC43827410</b></p>                     |
| <p><b>ZINC19843367</b></p>    | <p><b>ZINC19702473</b></p>    | <p><b>ZINC29866065</b></p>    | <p><b>ZINC42383718</b></p>                     |
| <p><b>ZINC55387165</b></p>  | <p><b>ZINC55387188</b></p>  | <p><b>ZINC79421413</b></p>  | <p><b>ZINC34724679</b></p>                   |
| <p><b>ZINC29866005</b></p>  | <p><b>ZINC03099925</b></p>  | <p><b>ZINC55387159</b></p>  | <p><b>ZINC66347916</b></p>                   |
| <p><b>ZINC19367229</b></p>  | <p><b>ZINC19089486</b></p>  | <p><b>ZINC54956851</b></p>  | <p><b>ZINC02511731</b></p>  <p><b>4d</b></p> |

|                                                                                                         |                                                                                                                   |                                                                                                                    |                                                                                                           |
|---------------------------------------------------------------------------------------------------------|-------------------------------------------------------------------------------------------------------------------|--------------------------------------------------------------------------------------------------------------------|-----------------------------------------------------------------------------------------------------------|
| <p>ZINC38539461</p> 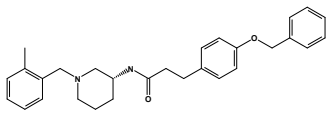   | <p>ZINC71507249</p>              | <p>ZINC19093318</p>              | <p>ZINC19935926</p>    |
| <p>ZINC21953405</p>    | <p>ZINC14007977</p>              | <p>ZINC51693525_1</p>            | <p>ZINC54333069_1</p>  |
| <p>ZINC28966621</p>   | <p>ZINC11888991</p>  <p>4c</p>  | <p>ZINC38534332</p>             | <p>ZINC19229953</p>   |
| <p>ZINC11888325</p>  | <p>ZINC83300623</p>            | <p>ZINC55363946</p>  <p>4a</p> | <p>ZINC95616532</p>  |
| <p>ZINC02235893</p>  | <p>ZINC11889049</p>  <p>4f</p> | <p>ZINC51692859_1</p>          | <p>ZINC81947185</p>  |

|                                                                                                                  |                                                                                                                |                                                                                                                 |                                                                                                                  |
|------------------------------------------------------------------------------------------------------------------|----------------------------------------------------------------------------------------------------------------|-----------------------------------------------------------------------------------------------------------------|------------------------------------------------------------------------------------------------------------------|
| <p><b>ZINC04535819_1</b></p> 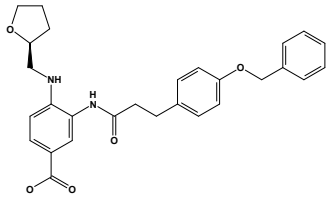   | <p><b>ZINC19230129</b></p>    | <p><b>ZINC19271184</b></p>    | <p><b>ZINC19843462</b></p>    |
| <p><b>ZINC40435017</b></p>      | <p><b>ZINC72202925_2</b></p>  | <p><b>ZINC11889002</b></p>    | <p><b>ZINC20182420</b></p>    |
| <p><b>ZINC55387114</b></p>    | <p><b>ZINC83570258</b></p>  | <p><b>ZINC72203320</b></p>  | <p><b>ZINC04384302</b></p>  |
| <p><b>ZINC51693621_1</b></p>  | <p><b>ZINC79439936</b></p>  | <p><b>ZINC01654079</b></p>  | <p><b>ZINC12397755</b></p>  |
| <p><b>ZINC32920027_1</b></p>  | <p><b>ZINC02882891</b></p>  | <p><b>ZINC21302905</b></p>  | <p><b>ZINC01611246</b></p>  |

4b

|                                                                                                                  |                                                                                                                |                                                                                                                   |                                                                                                                    |
|------------------------------------------------------------------------------------------------------------------|----------------------------------------------------------------------------------------------------------------|-------------------------------------------------------------------------------------------------------------------|--------------------------------------------------------------------------------------------------------------------|
| <p><b>ZINC45630704</b></p> 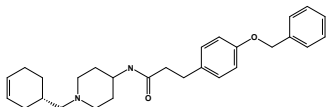     | <p><b>ZINC04203023</b></p>    | <p><b>ZINC26472770</b></p>      | <p><b>ZINC12506015</b></p>      |
| <p><b>ZINC11569591</b></p>      | <p><b>ZINC20508942</b></p>    | <p><b>ZINC19935932</b></p>      | <p><b>ZINC02569183</b></p>      |
| <p><b>ZINC72203771_1</b></p>  | <p><b>ZINC33426865</b></p>  | <p><b>ZINC61673926</b></p>    | <p><b>ZINC11888996</b></p>    |
| <p><b>ZINC19798429</b></p>    | <p><b>ZINC23116709</b></p>  | <p><b>ZINC36075382_1</b></p>  | <p><b>ZINC51693530_1</b></p>  |
