# Supplementary material
Source: PubMed Central journal article supplement (PMC7294724)
Supplement: ml0c00102_si_003.pdf [file ml0c00102_si_003.pdf]

|                                                                                                                |                                                                                                                |                                                                                                                 |                                                                                                                  |
|----------------------------------------------------------------------------------------------------------------|----------------------------------------------------------------------------------------------------------------|-----------------------------------------------------------------------------------------------------------------|------------------------------------------------------------------------------------------------------------------|
| <p><b>ZINC00053961</b></p> 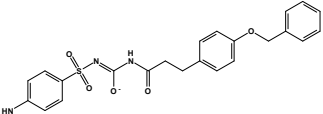   | <p><b>ZINC00115197</b></p>    | <p><b>ZINC00153515</b></p>    | <p><b>ZINC00154947</b></p>    |
| <p><b>ZINC00161751</b></p>    | <p><b>ZINC00168180</b></p>    | <p><b>ZINC00236086</b></p>    | <p><b>ZINC00241750</b></p>    |
| <p><b>ZINC00246869</b></p>  | <p><b>ZINC00335315</b></p>  | <p><b>ZINC00343473</b></p>  | <p><b>ZINC00352045</b></p>  |
| <p><b>ZINC00388387</b></p>  | <p><b>ZINC00390056</b></p>  | <p><b>ZINC00392706</b></p>  | <p><b>ZINC00404234</b></p>  |
| <p><b>ZINC00558847</b></p>  | <p><b>ZINC00968125</b></p>  | <p><b>ZINC01403529</b></p>  | <p><b>ZINC01433065</b></p>  |

|                                                                                                                                 |                                                                                                                                 |                                                                                                                                |                                                                                                                  |
|---------------------------------------------------------------------------------------------------------------------------------|---------------------------------------------------------------------------------------------------------------------------------|--------------------------------------------------------------------------------------------------------------------------------|------------------------------------------------------------------------------------------------------------------|
| <p><b>ZINC01439402</b></p> 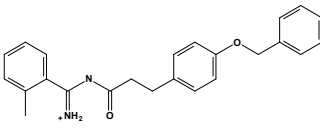                    | <p><b>ZINC01532501</b></p>                     | <p><b>ZINC01708144</b></p>  <p><b>4l</b></p> | <p><b>ZINC01848431</b></p>    |
| <p><b>ZINC02008458</b></p>                     | <p><b>ZINC02026502</b></p>                     | <p><b>ZINC02453837</b></p>                   | <p><b>ZINC02529012</b></p>    |
| <p><b>ZINC02540431</b></p>                   | <p><b>ZINC02557136</b></p>                   | <p><b>ZINC02559749</b></p>                 | <p><b>ZINC02579065</b></p>  |
| <p><b>ZINC03308215</b></p>                   | <p><b>ZINC03888838</b></p>  <p><b>4k</b></p> | <p><b>ZINC03953780</b></p>                 | <p><b>ZINC04072731</b></p>  |
| <p><b>ZINC04198753</b></p>  <p><b>4m</b></p> | <p><b>ZINC04200704</b></p>                   | <p><b>ZINC04205761</b></p>                 | <p><b>ZINC04244094</b></p>  |

|                                                                                                                |                                                                                                                |                                                                                                                 |                                                                                                                  |
|----------------------------------------------------------------------------------------------------------------|----------------------------------------------------------------------------------------------------------------|-----------------------------------------------------------------------------------------------------------------|------------------------------------------------------------------------------------------------------------------|
| <p><b>ZINC04244886</b></p> 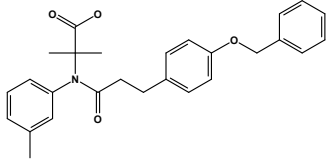   | <p><b>ZINC04280748</b></p>    | <p><b>ZINC04294378</b></p>    | <p><b>ZINC04450192</b></p>    |
| <p><b>ZINC04511156</b></p>    | <p><b>ZINC04632185</b></p>    | <p><b>ZINC04938424</b></p>    | <p><b>ZINC04944084</b></p>    |
| <p><b>ZINC05126301</b></p>  | <p><b>ZINC05425419</b></p>  | <p><b>ZINC05425469</b></p>   | <p><b>ZINC05479668</b></p>  |
| <p><b>ZINC05908671</b></p>  | <p><b>ZINC06061419</b></p>  | <p><b>ZINC06101264</b></p>  | <p><b>ZINC06678478</b></p>  |
| <p><b>ZINC08306618</b></p>  | <p><b>ZINC08628646</b></p>  | <p><b>ZINC12419687</b></p>  | <p><b>ZINC15635421</b></p>  |

4j

|                                                                                                                |                                                                                                                |                                                                                                                 |                                                                                                                  |
|----------------------------------------------------------------------------------------------------------------|----------------------------------------------------------------------------------------------------------------|-----------------------------------------------------------------------------------------------------------------|------------------------------------------------------------------------------------------------------------------|
| <p><b>ZINC15863061</b></p> 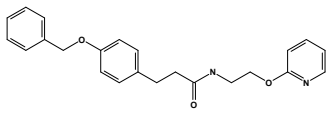   | <p><b>ZINC15884451</b></p>    | <p><b>ZINC16083007</b></p>    | <p><b>ZINC16158515</b></p>    |
| <p><b>ZINC16982849</b></p>    | <p><b>ZINC19092383</b></p>    | <p><b>ZINC19314134</b></p>    | <p><b>ZINC19418771</b></p>    |
| <p><b>ZINC19428259</b></p>  | <p><b>ZINC19594739</b></p>  | <p><b>ZINC19623909</b></p>  | <p><b>ZINC19641170</b></p>  |
| <p><b>ZINC19850424</b></p>  | <p><b>ZINC19872506</b></p>  | <p><b>ZINC20230772</b></p>  | <p><b>ZINC20230800</b></p>  |
| <p><b>ZINC20283369</b></p>  | <p><b>ZINC20374539</b></p>  | <p><b>ZINC20441605</b></p>  | <p><b>ZINC20597101</b></p>  |

4g

|                                                                                                                |                                                                                                                |                                                                                                                 |                                                                                                                  |
|----------------------------------------------------------------------------------------------------------------|----------------------------------------------------------------------------------------------------------------|-----------------------------------------------------------------------------------------------------------------|------------------------------------------------------------------------------------------------------------------|
| <p><b>ZINC22007513</b></p> 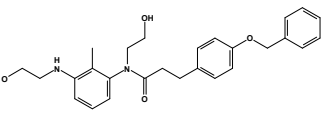   | <p><b>ZINC22011423</b></p>    | <p><b>ZINC26898439</b></p>    | <p><b>ZINC26898551</b></p>    |
| <p><b>ZINC34431401</b></p>    | <p><b>ZINC34515201</b></p>    | <p><b>ZINC34883594</b></p>    | <p><b>ZINC35635896</b></p>    |
| <p><b>ZINC36467305</b></p>  | <p><b>ZINC36683971</b></p>  | <p><b>ZINC37034441</b></p>  | <p><b>ZINC37381456</b></p>  |
| <p><b>ZINC39053208</b></p>  | <p><b>ZINC39053265</b></p>  | <p><b>ZINC39209763</b></p>  | <p><b>ZINC39320002</b></p>  |
| <p><b>ZINC40447890</b></p>  | <p><b>ZINC40447905</b></p>  | <p><b>ZINC40448287</b></p>  | <p><b>ZINC42684553</b></p>  |

|                                                                                                                |                                                                                                                |                                                                                                                 |                                                                                                                  |
|----------------------------------------------------------------------------------------------------------------|----------------------------------------------------------------------------------------------------------------|-----------------------------------------------------------------------------------------------------------------|------------------------------------------------------------------------------------------------------------------|
| <p><b>ZINC44121421</b></p> 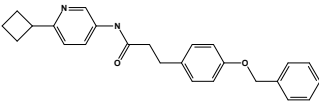   | <p><b>ZINC47844169</b></p>    | <p><b>ZINC51693525</b></p>    | <p><b>ZINC59452488</b></p>    |
| <p><b>ZINC59625919</b></p>    | <p><b>ZINC65356663</b></p>    | <p><b>ZINC72411169</b></p>    | <p><b>ZINC79439159</b></p>    |
| <p><b>ZINC82047341</b></p>   | <p><b>ZINC82835860</b></p>  | <p><b>ZINC91691777</b></p>   | <p><b>ZINC91692367</b></p>  |
| <p><b>ZINC95835783</b></p>  | <p><b>ZINC96029078</b></p>  | <p><b>ZINC96029081</b></p>  |                                                                                                                  |
